# Supplementary material
Source: MDPI journal article supplement (https://www.mdpi.com/2076-3417/11/16/7356)
Supplement: s1 [file s1 › applsci-1288847-supplementary.pdf]

# **Association of Breed of Sheep or Goats with Somatic Cell Counts and Total Bacterial Counts of Bulk-Tank Milk**

**Daphne T. Lianou, Charalambia K. Michael, Natalia G.C. Vasileiou, Dimitra V. Liagka,  
Vasia S. Mavrogianni, Mariangela Caroprese and George C. Fthenakis**

**Table S1.** Zootechnical characteristics of 444 small ruminant farms in Greece, classified in accord to the breed of animals therein.

| Breed                                       | Origin of breed <sup>1</sup> | Farms (n) | Management system applied in the farms <sup>2</sup> |     |     |    | Application of machine-milking |    | Average month into lactation period at sampling | Average no. of animals per farm <sup>4</sup> | Average yearly milk production per animal (L) <sup>4</sup> | Application of teat disinfection at milking |    |
|---------------------------------------------|------------------------------|-----------|-----------------------------------------------------|-----|-----|----|--------------------------------|----|-------------------------------------------------|----------------------------------------------|------------------------------------------------------------|---------------------------------------------|----|
|                                             |                              |           | I <sup>2</sup>                                      | s-I | s-E | E  | Y <sup>3</sup>                 | N  |                                                 |                                              |                                                            | Y <sup>3</sup>                              | N  |
|                                             |                              |           |                                                     |     |     |    |                                |    |                                                 |                                              |                                                            |                                             |    |
| Sheep farms                                 |                              |           |                                                     |     |     |    |                                |    |                                                 |                                              |                                                            |                                             |    |
| Assaf                                       | imported                     | 30        | 5                                                   | 20  | 5   | 0  | 28                             | 2  | 5.5                                             | 296±39                                       | 274±17                                                     | 4                                           | 26 |
| Awassi                                      | imported                     | 1         | 0                                                   | 1   | 0   | 0  | 1                              | 0  | 4.0                                             | 170                                          | 235                                                        | 0                                           | 1  |
| Boutsko                                     | indigenous                   | 2         | 0                                                   | 0   | 2   | 0  | 0                              | 2  | 5.5                                             | 587±414                                      | 107±3                                                      | 0                                           | 2  |
| Chios                                       | indigenous                   | 44        | 11                                                  | 19  | 14  | 0  | 34                             | 10 | 5.0                                             | 317±43                                       | 217±14                                                     | 11                                          | 33 |
| Crossbreds                                  | cross                        | 43        | 3                                                   | 17  | 20  | 3  | 31                             | 12 | 5.0                                             | 311±28                                       | 180±10                                                     | 6                                           | 37 |
| Friesarta                                   | indigenous                   | 12        | 2                                                   | 5   | 4   | 1  | 11                             | 1  | 6.5                                             | 259±41                                       | 242±19                                                     | 1                                           | 11 |
| Friesian                                    | imported                     | 13        | 0                                                   | 7   | 6   | 0  | 6                              | 7  | 5.0                                             | 220±51                                       | 223±31                                                     | 2                                           | 11 |
| Karagouniko                                 | indigenous                   | 5         | 0                                                   | 3   | 1   | 1  | 4                              | 1  | 4.0                                             | 190±55                                       | 185±43                                                     | 1                                           | 4  |
| Kefallinia                                  | indigenous                   | 1         | 0                                                   | 0   | 1   | 0  | 1                              | 0  | 4.0                                             | 120                                          | 150                                                        | 0                                           | 1  |
| Lacaune                                     | imported                     | 95        | 20                                                  | 54  | 20  | 1  | 92                             | 3  | 5.0                                             | 389±28                                       | 236±9                                                      | 18                                          | 77 |
| ‘Local’ <sup>5</sup>                        | indigenous                   | 55        | 1                                                   | 16  | 27  | 11 | 31                             | 24 | 5.0                                             | 278±27                                       | 159±9                                                      | 7                                           | 48 |
| Mytilini                                    | indigenous                   | 18        | 1                                                   | 9   | 5   | 3  | 15                             | 3  | 7.0                                             | 322±34                                       | 168±12                                                     | 2                                           | 16 |
| Sfakia                                      | indigenous                   | 6         | 0                                                   | 0   | 2   | 4  | 1                              | 5  | 7.0                                             | 487±113                                      | 58±5                                                       | 0                                           | 6  |
| Goat farms                                  |                              |           |                                                     |     |     |    |                                |    |                                                 |                                              |                                                            |                                             |    |
| Alpine                                      | imported                     | 9         | 1                                                   | 1   | 7   | 0  | 6                              | 3  | 6.0                                             | 122±42                                       | 280±53                                                     | 0                                           | 9  |
| Crossbreds                                  | cross                        | 18        | 1                                                   | 3   | 14  | 0  | 15                             | 3  | 4.5                                             | 132±39                                       | 190±19                                                     | 4                                           | 14 |
| Damascus                                    | imported                     | 18        | 0                                                   | 9   | 8   | 1  | 10                             | 8  | 5.5                                             | 345±81                                       | 233±24                                                     | 2                                           | 16 |
| Kefallinia                                  | indigenous                   | 1         | 0                                                   | 0   | 1   | 0  | 1                              | 0  | 2.0                                             | 250                                          | 140                                                        | 0                                           | 1  |
| Indigenous Greek<br>( <i>Capra prisca</i> ) | indigenous                   | 50        | 1                                                   | 5   | 27  | 17 | 18                             | 32 | 5.0                                             | 262±26                                       | 147±11                                                     | 1                                           | 49 |

|                    |            |    |   |   |   |   |    |   |     |        |        |   |   |
|--------------------|------------|----|---|---|---|---|----|---|-----|--------|--------|---|---|
| Murciano-Granadina | imported   | 13 | 5 | 7 | 1 | 0 | 11 | 2 | 4.5 | 222±72 | 255±30 | 4 | 9 |
| Saanen             | imported   | 5  | 1 | 3 | 1 | 0 | 4  | 1 | 8.5 | 155±82 | 472±52 | 1 | 4 |
| Skopelos           | indigenous | 5  | 0 | 1 | 2 | 2 | 1  | 4 | 3.5 | 313±95 | 117±15 | 0 | 5 |

<sup>1</sup> imported: breed brought into Greece from another country, indigenous: breed native of Greece or created in the country, cross: cross between imported or indigenous breeds; <sup>2</sup> management system applied in farms classified according to the standards of the European Food Safety Authority [European Food Safety Authority. Scientific opinion on the welfare risks related to the farming of sheep for wool, meat and milk production. *EFSA J.* **2014**, *12*, 3933–4060] – I: intensive, s-I: semi-intensive, s-E: semi-extensive, E: extensive; <sup>3</sup> Y: yes, N: no; <sup>4</sup> mean±standard error of the mean; <sup>5</sup> the term, as used by the respective farmers, referred to a variety of small-scale breeds, not always related between them and each one prevailing only in some areas of the country with limited geographic dissemination.

**Table S2.** Details of multivariable models employed for the evaluation of "increased somatic cell counts in bulk-tank milk" (i.e., with SCC above  $0.75 \times 10^6$  cells mL<sup>-1</sup>) and "increased total bacterial counts in bulk-tank milk" (i.e., with TBC above  $1500 \times 10^3$  cfu mL<sup>-1</sup>) with the zootechnical characteristics of 444 small ruminant farms in Greece.

| Outcome                          |                                                  | Variables offered to the multivariable models ( <i>n</i> ) | Variables required in the final models                                                                                                                                        |
|----------------------------------|--------------------------------------------------|------------------------------------------------------------|-------------------------------------------------------------------------------------------------------------------------------------------------------------------------------|
| Increased somatic cell counts    | Sheep flocks all breeds                          | 4                                                          | (a) sheep breed, (b) management system applied in farm, (c) application of machine-milking in farm, (d) month into lactation period at sampling                               |
| Increased somatic cell counts    | Sheep flocks six most frequently recorded breeds | 4                                                          | (a) sheep breed, (b) management system applied in farm, (c) application of machine-milking in farm, (d) number of animals in farm                                             |
| Increased total bacterial counts | Sheep flocks all breeds                          | 4                                                          | (a) management system applied in farm, (b) application of machine-milking in farm, (c) month into lactation period at sampling, (d) average yearly milk production per animal |
| Increased total bacterial counts | Sheep flocks six most frequently recorded breeds | 3                                                          | (a) management system applied in farm, (b) month into lactation period at sampling, (c) average yearly milk production per animal                                             |
| Increased somatic cell counts    | Goat herds all breeds                            | 1                                                          | (a) sheep breed                                                                                                                                                               |
| Increased somatic cell counts    | Goat herds four most frequently recorded breeds  | 2                                                          | (a) sheep breed, (b) management system applied in farm                                                                                                                        |
| Increased total bacterial counts | Goat herds all breeds                            | 2                                                          | (a) number of animals per farm, (b) application of teat disinfection at milking                                                                                               |
| Increased total bacterial counts | Goat herds four most frequently recorded breeds  | 2                                                          | (a) number of animals per farm, (b) application of teat disinfection at milking                                                                                               |

**Table S3.** Associations of zootechnical characteristics with increased somatic cell counts in bulk-tank milk (i.e., above  $0.75 \times 10^6$  cells mL<sup>-1</sup>) in 325 sheep farms in Greece, as found in univariable analysis.

A) Analysis with all the farms, independently of the number of farms with each breed

| Number of farms                                                         |                |                                    |            |                       |                                                                     |                       |                |                                    |            |                       |
|-------------------------------------------------------------------------|----------------|------------------------------------|------------|-----------------------|---------------------------------------------------------------------|-----------------------|----------------|------------------------------------|------------|-----------------------|
| Farms with no increased somatic cell counts in bulk-tank milk (n = 236) |                |                                    |            |                       | Farms with increased somatic cell counts in bulk-tank milk (n = 89) |                       |                |                                    |            | <i>p</i>              |
| Breed                                                                   |                |                                    |            |                       |                                                                     |                       |                |                                    |            |                       |
| Assaf                                                                   | Awassi         | Boutsko                            | Chios      | Crossbreds            | Assaf                                                               | Awassi                | Boutsko        | Chios                              | Crossbreds |                       |
| 21/30                                                                   | 1/1            | 2/2                                | 26/44      | 26/43                 | 9/30                                                                | 0/1                   | 0/2            | 18/44                              | 17/43      |                       |
| Friesarta                                                               | Friesian       | Karagouniko                        | Kefallinia | Lacaune               | Friesarta                                                           | Friesian              | Karagouniko    | Kefallinia                         | Lacaune    |                       |
| 9/12                                                                    | 11/13          | 3/5                                | 1/1        | 77/95                 | 3/12                                                                | 2/13                  | 2/5            | 0/1                                | 18/95      |                       |
| ‘Local’                                                                 | Mytilini       | Sfakia                             |            |                       | ‘Local’                                                             | Mytilini              | Sfakia         |                                    |            |                       |
| 39/55                                                                   | 16/18          | 4/6                                |            |                       | 16/55                                                               | 2/18                  | 2/6            |                                    |            | 0.18                  |
| Management system applied in farm                                       |                |                                    |            |                       |                                                                     |                       |                |                                    |            |                       |
| Intensive                                                               | Semi-intensive | Semi-extensive                     | Extensive  |                       | Intensive                                                           | Semi-intensive        | Semi-extensive | Extensive                          |            |                       |
| 28/43                                                                   | 118/151        | 76/107                             | 14/24      |                       | 15/43                                                               | 33/151                | 31/107         | 10/24                              |            | 0.11                  |
| Application of machine-milking in farm                                  |                |                                    |            |                       |                                                                     |                       |                |                                    |            |                       |
| Yes                                                                     |                |                                    | No         |                       | Yes                                                                 |                       |                | No                                 |            |                       |
| 196/255                                                                 |                |                                    | 40/70      |                       | 59/255                                                              |                       |                | 30/70                              |            | 0.001                 |
| Month into lactation period at sampling                                 |                |                                    |            |                       |                                                                     |                       |                |                                    |            |                       |
| Up to 3 <sup>rd</sup>                                                   |                | 3 <sup>rd</sup> to 6 <sup>th</sup> |            | After 6 <sup>th</sup> |                                                                     | Up to 3 <sup>rd</sup> |                | 3 <sup>rd</sup> to 6 <sup>th</sup> |            | After 6 <sup>th</sup> |
| 69/98                                                                   |                | 62/94                              |            | 105/133               |                                                                     | 29/98                 |                | 32/94                              |            | 28/133                |
|                                                                         |                |                                    |            |                       |                                                                     |                       |                |                                    |            | 0.08                  |
| No. of animals in farm                                                  |                |                                    |            |                       |                                                                     |                       |                |                                    |            |                       |
| Up to 250                                                               |                | 251-500                            |            | Over 500              |                                                                     | Up to 250             |                | 251-500                            |            | Over 500              |
| 132/180                                                                 |                | 85/118                             |            | 19/27                 |                                                                     | 48/180                |                | 33/118                             |            | 8/27                  |
|                                                                         |                |                                    |            |                       |                                                                     |                       |                |                                    |            | 0.93                  |

| Yearly milk production per animal                                            |                |                |           |                                                                     |                |                |           |
|------------------------------------------------------------------------------|----------------|----------------|-----------|---------------------------------------------------------------------|----------------|----------------|-----------|
| Up to 300 L                                                                  |                | Over 300 L     |           | Up to 300 L                                                         |                | Over 300 L     |           |
| 202/281                                                                      |                | 34/44          |           | 79/281                                                              |                | 10/44          |           |
|                                                                              |                |                |           |                                                                     |                | 0.46           |           |
| Application of teat disinfection at milking                                  |                |                |           |                                                                     |                |                |           |
| Yes                                                                          |                | No             |           | Yes                                                                 |                | No             |           |
| 35/52                                                                        |                | 201/273        |           | 17/52                                                               |                | 72/273         |           |
|                                                                              |                |                |           |                                                                     |                | 0.35           |           |
| B) Analysis with only the farms with the six most frequently recorded breeds |                |                |           |                                                                     |                |                |           |
| Number of farms                                                              |                |                |           |                                                                     |                |                |           |
| Farms with no increased somatic cell counts in bulk-tank milk (n = 160)      |                |                |           | Farms with increased somatic cell counts in bulk-tank milk (n = 52) |                |                | p         |
| Breed                                                                        |                |                |           |                                                                     |                |                |           |
| Assaf                                                                        |                | Chios          |           | Friesarta                                                           |                | Friesarta      |           |
| 21/30                                                                        |                | 26/44          |           | 9/12                                                                |                | 3/12           |           |
| Friesian                                                                     |                | Lacaune        |           | Mytilini                                                            |                | Mytilini       |           |
| 11/13                                                                        |                | 77/95          |           | 16/18                                                               |                | 2/18           |           |
|                                                                              |                |                |           | 2/13                                                                |                | 18/95          |           |
|                                                                              |                |                |           |                                                                     |                | 0.055          |           |
| Management system applied in farm                                            |                |                |           |                                                                     |                |                |           |
| Intensive                                                                    | Semi-intensive | Semi-extensive | Extensive | Intensive                                                           | Semi-intensive | Semi-extensive | Extensive |
| 25/39                                                                        | 92/114         | 40/54          | 3/5       | 14/39                                                               | 22/114         | 14/54          | 2/5       |
|                                                                              |                |                |           |                                                                     |                |                |           |
|                                                                              |                |                |           |                                                                     |                |                |           |
|                                                                              |                |                |           |                                                                     |                |                |           |
|                                                                              |                |                |           |                                                                     |                |                |           |
|                                                                              |                |                |           |                                                                     |                |                |           |
|                                                                              |                |                |           |                                                                     |                |                |           |
|                                                                              |                |                |           |                                                                     |                |                |           |
|                                                                              |                |                |           |                                                                     |                |                |           |
|                                                                              |                |                |           |                                                                     |                |                |           |
|                                                                              |                |                |           |                                                                     |                |                |           |
|                                                                              |                |                |           |                                                                     |                |                |           |
|                                                                              |                |                |           |                                                                     |                |                |           |
|                                                                              |                |                |           |                                                                     |                |                |           |
|                                                                              |                |                |           |                                                                     |                |                |           |
|                                                                              |                |                |           |                                                                     |                |                |           |
|                                                                              |                |                |           |                                                                     |                |                |           |
|                                                                              |                |                |           |                                                                     |                |                |           |
|                                                                              |                |                |           |                                                                     |                |                |           |
|                                                                              |                |                |           |                                                                     |                |                |           |
|                                                                              |                |                |           |                                                                     |                |                |           |
|                                                                              |                |                |           |                                                                     |                |                |           |
|                                                                              |                |                |           |                                                                     |                |                |           |
|                                                                              |                |                |           |                                                                     |                |                |           |
|                                                                              |                |                |           |                                                                     |                |                |           |
|                                                                              |                |                |           |                                                                     |                |                |           |
|                                                                              |                |                |           |                                                                     |                |                |           |
|                                                                              |                |                |           |                                                                     |                |                |           |
|                                                                              |                |                |           |                                                                     |                |                |           |
|                                                                              |                |                |           |                                                                     |                |                |           |
|                                                                              |                |                |           |                                                                     |                |                |           |
|                                                                              |                |                |           |                                                                     |                |                |           |
|                                                                              |                |                |           |                                                                     |                |                |           |
|                                                                              |                |                |           |                                                                     |                |                |           |
|                                                                              |                |                |           |                                                                     |                |                |           |
|                                                                              |                |                |           |                                                                     |                |                |           |
|                                                                              |                |                |           |                                                                     |                |                |           |
|                                                                              |                |                |           |                                                                     |                |                |           |
|                                                                              |                |                |           |                                                                     |                |                |           |
|                                                                              |                |                |           |                                                                     |                |                |           |
|                                                                              |                |                |           |                                                                     |                |                |           |
|                                                                              |                |                |           |                                                                     |                |                |           |
|                                                                              |                |                |           |                                                                     |                |                |           |
|                                                                              |                |                |           |                                                                     |                |                |           |
|                                                                              |                |                |           |                                                                     |                |                |           |
|                                                                              |                |                |           |                                                                     |                |                |           |
|                                                                              |                |                |           |                                                                     |                |                |           |
|                                                                              |                |                |           |                                                                     |                |                |           |
|                                                                              |                |                |           |                                                                     |                |                |           |
|                                                                              |                |                |           |                                                                     |                |                |           |
|                                                                              |                |                |           |                                                                     |                |                |           |
|                                                                              |                |                |           |                                                                     |                |                |           |
|                                                                              |                |                |           |                                                                     |                |                |           |
|                                                                              |                |                |           |                                                                     |                |                |           |
|                                                                              |                |                |           |                                                                     |                |                |           |
|                                                                              |                |                |           |                                                                     |                |                |           |
|                                                                              |                |                |           |                                                                     |                |                |           |
|                                                                              |                |                |           |                                                                     |                |                |           |
|                                                                              |                |                |           |                                                                     |                |                |           |
|                                                                              |                |                |           |                                                                     |                |                |           |
|                                                                              |                |                |           |                                                                     |                |                |           |
|                                                                              |                |                |           |                                                                     |                |                |           |
|                                                                              |                |                |           |                                                                     |                |                |           |
|                                                                              |                |                |           |                                                                     |                |                |           |
|                                                                              |                |                |           |                                                                     |                |                |           |
|                                                                              |                |                |           |                                                                     |                |                |           |
|                                                                              |                |                |           |                                                                     |                |                |           |
|                                                                              |                |                |           |                                                                     |                |                |           |
|                                                                              |                |                |           |                                                                     |                |                |           |
|                                                                              |                |                |           |                                                                     |                |                |           |
|                                                                              |                |                |           |                                                                     |                |                |           |
|                                                                              |                |                |           |                                                                     |                |                |           |
|                                                                              |                |                |           |                                                                     |                |                |           |
|                                                                              |                |                |           |                                                                     |                |                |           |
|                                                                              |                |                |           |                                                                     |                |                |           |
|                                                                              |                |                |           |                                                                     |                |                |           |
|                                                                              |                |                |           |                                                                     |                |                |           |
|                                                                              |                |                |           |                                                                     |                |                |           |
|                                                                              |                |                |           |                                                                     |                |                |           |
|                                                                              |                |                |           |                                                                     |                |                |           |
|                                                                              |                |                |           |                                                                     |                |                |           |
|                                                                              |                |                |           |                                                                     |                |                |           |
|                                                                              |                |                |           |                                                                     |                |                |           |
|                                                                              |                |                |           |                                                                     |                |                |           |
|                                                                              |                |                |           |                                                                     |                |                |           |
|                                                                              |                |                |           |                                                                     |                |                |           |
|                                                                              |                |                |           |                                                                     |                |                |           |
|                                                                              |                |                |           |                                                                     |                |                |           |
|                                                                              |                |                |           |                                                                     |                |                |           |
|                                                                              |                |                |           |                                                                     |                |                |           |
|                                                                              |                |                |           |                                                                     |                |                |           |
|                                                                              |                |                |           |                                                                     |                |                |           |
|                                                                              |                |                |           |                                                                     |                |                |           |
|                                                                              |                |                |           |                                                                     |                |                |           |
|                                                                              |                |                |           |                                                                     |                |                |           |
|                                                                              |                |                |           |                                                                     |                |                |           |
|                                                                              |                |                |           |                                                                     |                |                |           |
|                                                                              |                |                |           |                                                                     |                |                |           |
|                                                                              |                |                |           |                                                                     |                |                |           |
|                                                                              |                |                |           |                                                                     |                |                |           |
|                                                                              |                |                |           |                                                                     |                |                |           |
|                                                                              |                |                |           |                                                                     |                |                |           |
|                                                                              |                |                |           |                                                                     |                |                |           |
|                                                                              |                |                |           |                                                                     |                |                |           |
|                                                                              |                |                |           |                                                                     |                |                |           |
|                                                                              |                |                |           |                                                                     |                |                |           |
|                                                                              |                |                |           |                                                                     |                |                |           |
|                                                                              |                |                |           |                                                                     |                |                |           |
|                                                                              |                |                |           |                                                                     |                |                |           |
|                                                                              |                |                |           |                                                                     |                |                |           |
|                                                                              |                |                |           |                                                                     |                |                |           |
|                                                                              |                |                |           |                                                                     |                |                |           |
|                                                                              |                |                |           |                                                                     |                |                |           |
|                                                                              |                |                |           |                                                                     |                |                |           |
|                                                                              |                |                |           |                                                                     |                |                |           |
|                                                                              |                |                |           |                                                                     |                |                |           |
|                                                                              |                |                |           |                                                                     |                |                |           |
|                                                                              |                |                |           |                                                                     |                |                |           |
|                                                                              |                |                |           |                                                                     |                |                |           |
|                                                                              |                |                |           |                                                                     |                |                |           |
|                                                                              |                |                |           |                                                                     |                |                |           |
|                                                                              |                |                |           |                                                                     |                |                |           |
|                                                                              |                |                |           |                                                                     |                |                |           |
|                                                                              |                |                |           |                                                                     |                |                |           |
|                                                                              |                |                |           |                                                                     |                |                |           |

| No. of animals in farm                      |         |            |             |         |            |       |
|---------------------------------------------|---------|------------|-------------|---------|------------|-------|
| Up to 250                                   | 251-500 | Over 500   | Up to 250   | 251-500 | Over 500   |       |
| 91/120                                      | 63/79   | 6/13       | 29/120      | 16/79   | 7/13       | 0.033 |
| Yearly milk production per animal           |         |            |             |         |            |       |
| Up to 300 L                                 |         | Over 300 L | Up to 300 L |         | Over 300 L |       |
| 130/177                                     |         | 30/39      | 43/177      |         | 9/39       | 0.82  |
| Application of teat disinfection at milking |         |            |             |         |            |       |
| Yes                                         |         | No         | Yes         |         | No         |       |
| 27/38                                       |         | 133/174    | 11/38       |         | 41/174     | 0.48  |

**Table S4.** Associations of zootechnical characteristics with increased total bacterial counts in bulk-tank milk (i.e., above  $1500 \times 10^3$  cfu mL<sup>-1</sup>) in 325 sheep farms in Greece, as found in univariable analysis.

A) Analysis with all the farms, independently of the number of farms with each breed

| Number of farms                                                            |                |                                    |            |                       |                                                                        |                       |                |                                    |            |      |
|----------------------------------------------------------------------------|----------------|------------------------------------|------------|-----------------------|------------------------------------------------------------------------|-----------------------|----------------|------------------------------------|------------|------|
| Farms with no increased total bacterial counts in bulk-tank milk (n = 267) |                |                                    |            |                       | Farms with increased total bacterial counts in bulk-tank milk (n = 58) |                       |                |                                    |            | P    |
| Breed                                                                      |                |                                    |            |                       |                                                                        |                       |                |                                    |            |      |
| Assaf                                                                      | Awassi         | Boutsko                            | Chios      | Crossbreds            | Assaf                                                                  | Awassi                | Boutsko        | Chios                              | Crossbreds |      |
| 27/30                                                                      | 1/1            | 2/2                                | 35/44      | 31/43                 | 3/30                                                                   | 0/1                   | 0/2            | 9/44                               | 12/43      |      |
| Friesarta                                                                  | Friesian       | Karagouniko                        | Kefallinia | Lacaune               | Friesarta                                                              | Friesian              | Karagouniko    | Kefallinia                         | Lacaune    |      |
| 10/12                                                                      | 13/13          | 3/5                                | 1/1        | 76/95                 | 2/12                                                                   | 0/13                  | 2/5            | 0/1                                | 19/95      |      |
| ‘Local’                                                                    | Mytilini       | Sfakia                             |            |                       | ‘Local’                                                                | Mytilini              | Sfakia         |                                    |            |      |
| 46/55                                                                      | 16/18          | 6/6                                |            |                       | 9/55                                                                   | 2/18                  | 0/6            |                                    | 0.44       |      |
| Management system applied in farm                                          |                |                                    |            |                       |                                                                        |                       |                |                                    |            |      |
| Intensive                                                                  | Semi-intensive | Semi-extensive                     | Extensive  |                       | Intensive                                                              | Semi-intensive        | Semi-extensive | Extensive                          |            |      |
| 32/43                                                                      | 131/151        | 86/107                             | 18/24      |                       | 11/43                                                                  | 20/151                | 21/107         | 6/24                               | 0.17       |      |
| Application of machine-milking in farm                                     |                |                                    |            |                       |                                                                        |                       |                |                                    |            |      |
| Yes                                                                        |                |                                    | No         |                       | Yes                                                                    |                       |                | No                                 |            |      |
| 210/255                                                                    |                |                                    | 57/70      |                       | 45/255                                                                 |                       |                | 13/70                              |            |      |
| Month into lactation period at sampling                                    |                |                                    |            |                       |                                                                        |                       |                |                                    |            |      |
| Up to 3 <sup>rd</sup>                                                      |                | 3 <sup>rd</sup> to 6 <sup>th</sup> |            | After 6 <sup>th</sup> |                                                                        | Up to 3 <sup>rd</sup> |                | 3 <sup>rd</sup> to 6 <sup>th</sup> |            |      |
| 73/98                                                                      |                | 74/94                              |            | 120/133               |                                                                        | 25/98                 |                | 20/94                              |            |      |
| No. of animals in farm                                                     |                |                                    |            |                       |                                                                        |                       |                |                                    |            |      |
| Up to 250                                                                  |                | 251-500                            |            | Over 500              |                                                                        | Up to 250             |                | 251-500                            |            |      |
| 146/180                                                                    |                | 98/118                             |            | 23/27                 |                                                                        | 34/180                |                | 20/118                             |            |      |
| Yearly milk production per animal                                          |                |                                    |            |                       |                                                                        |                       |                |                                    |            |      |
| Up to 300 L                                                                |                |                                    | Over 300 L |                       |                                                                        | Up to 300 L           |                |                                    | Over 300 L |      |
| 235/281                                                                    |                |                                    | 32/44      |                       |                                                                        | 46/281                |                |                                    | 12/44      |      |
|                                                                            |                |                                    |            |                       |                                                                        |                       |                |                                    |            | 0.08 |

| Application of teat disinfection at milking |         |       |        |      |
|---------------------------------------------|---------|-------|--------|------|
| Yes                                         | No      | Yes   | No     |      |
| 41/52                                       | 226/273 | 11/52 | 47/273 | 0.50 |

B) Analysis with only the farms with the six most frequently recorded breeds

| Number of farms                                                            |                                    |                       |           |                                                                        |                                    |                       |           |
|----------------------------------------------------------------------------|------------------------------------|-----------------------|-----------|------------------------------------------------------------------------|------------------------------------|-----------------------|-----------|
| Farms with no increased total bacterial counts in bulk-tank milk (n = 177) |                                    |                       |           | Farms with increased total bacterial counts in bulk-tank milk (n = 35) |                                    |                       | P         |
| Breed                                                                      |                                    |                       |           |                                                                        |                                    |                       |           |
| Assaf                                                                      | Chios                              | Friesarta             |           | Assaf                                                                  | Chios                              | Friesarta             |           |
| 27/30                                                                      | 35/44                              | 10/12                 |           | 3/30                                                                   | 9/44                               | 2/12                  |           |
| Friesian                                                                   | Lacaune                            | Mytilini              |           | Friesian                                                               | Lacaune                            | Mytilini              |           |
| 13/13                                                                      | 76/95                              | 16/18                 |           | 0/13                                                                   | 19/95                              | 2/18                  | 0.39      |
| Management system applied in farm                                          |                                    |                       |           |                                                                        |                                    |                       |           |
| Intensive                                                                  | Semi-intensive                     | Semi-extensive        | Extensive | Intensive                                                              | Semi-intensive                     | Semi-extensive        | Extensive |
| 28/39                                                                      | 101/114                            | 45/54                 | 3/5       | 11/39                                                                  | 13/114                             | 9/54                  | 2/5       |
| Application of machine-milking in farm                                     |                                    |                       |           |                                                                        |                                    |                       |           |
| Yes                                                                        | No                                 |                       |           | Yes                                                                    | No                                 |                       |           |
| 155/186                                                                    | 22/26                              |                       |           | 31/186                                                                 | 4/26                               |                       | 0.87      |
| Month into lactation period at sampling                                    |                                    |                       |           |                                                                        |                                    |                       |           |
| Up to 3 <sup>rd</sup>                                                      | 3 <sup>rd</sup> to 6 <sup>th</sup> | After 6 <sup>th</sup> |           | Up to 3 <sup>rd</sup>                                                  | 3 <sup>rd</sup> to 6 <sup>th</sup> | After 6 <sup>th</sup> |           |
| 50/64                                                                      | 42/52                              | 85/94                 |           | 14/64                                                                  | 12/52                              | 9/94                  | 0.05      |
| No. of animals in farm                                                     |                                    |                       |           |                                                                        |                                    |                       |           |
| Up to 250                                                                  | 251-500                            | Over 500              |           | Up to 250                                                              | 251-500                            | Over 500              |           |
| 99/120                                                                     | 66/79                              | 12/13                 |           | 21/120                                                                 | 13/79                              | 1/13                  | 0.66      |

| Yearly milk production per animal           |            |             |            |      |
|---------------------------------------------|------------|-------------|------------|------|
| Up to 300 L                                 | Over 300 L | Up to 300 L | Over 300 L |      |
| 148/177                                     | 29/39      | 29/177      | 10/39      | 0.17 |
| Application of teat disinfection at milking |            |             |            |      |
| Yes                                         | No         | Yes         | No         |      |
| 33/38                                       | 144/174    | 5/38        | 30/174     | 0.54 |

**Table S5.** Associations of zootechnical characteristics with increased somatic cell counts in bulk-tank milk (i.e., above  $0.75 \times 10^6$  cells mL<sup>-1</sup>) in 119 goat farms in Greece, as found in univariable analysis.

A) Analysis with all the farms, independently of the number of farms with each breed

| Number of farms                                                        |                                    |                       |            |                                                                     |                                    |                       |            |          |
|------------------------------------------------------------------------|------------------------------------|-----------------------|------------|---------------------------------------------------------------------|------------------------------------|-----------------------|------------|----------|
| Farms with no increased somatic cell counts in bulk-tank milk (n = 42) |                                    |                       |            | Farms with increased somatic cell counts in bulk-tank milk (n = 77) |                                    |                       |            | <i>p</i> |
| Breed                                                                  |                                    |                       |            |                                                                     |                                    |                       |            |          |
| Alpine                                                                 | Crossbreds                         | Damascus              | Kefallinia | Alpine                                                              | Crossbreds                         | Damascus              | Kefallinia |          |
| 6/9                                                                    | 7/18                               | 5/18                  | 0/1        | 3/9                                                                 | 11/18                              | 13/18                 | 1/1        |          |
| Indigenous Greek<br>( <i>Capra prisca</i> )                            | Murciano-Granadina                 | Saanen                | Skopelos   | Indigenous Greek<br>( <i>Capra prisca</i> )                         | Murciano-Granadina                 | Saanen                | Skopelos   |          |
| 10/50                                                                  | 9/13                               | 2/5                   | 3/5        | 40/50                                                               | 4/13                               | 3/5                   | 2/5        | 0.012    |
| Management system applied in farm                                      |                                    |                       |            |                                                                     |                                    |                       |            |          |
| Intensive                                                              | Semi-intensive                     | Semi-extensive        | Extensive  | Intensive                                                           | Semi-intensive                     | Semi-extensive        | Extensive  |          |
| 5/9                                                                    | 11/29                              | 22/61                 | 4/20       | 4/9                                                                 | 18/29                              | 39/61                 | 16/20      | 0.29     |
| Application of machine-milking in farm                                 |                                    |                       |            |                                                                     |                                    |                       |            |          |
| Yes                                                                    |                                    | No                    |            | Yes                                                                 |                                    | No                    |            |          |
| 24/66                                                                  |                                    | 18/53                 |            | 42/66                                                               |                                    | 35/53                 |            | 0.79     |
| Month into lactation period at sampling                                |                                    |                       |            |                                                                     |                                    |                       |            |          |
| Up to 3 <sup>rd</sup>                                                  | 3 <sup>rd</sup> to 6 <sup>th</sup> | After 6 <sup>th</sup> |            | Up to 3 <sup>rd</sup>                                               | 3 <sup>rd</sup> to 6 <sup>th</sup> | After 6 <sup>th</sup> |            |          |
| 14/36                                                                  | 19/50                              | 9/33                  |            | 22/36                                                               | 31/50                              | 24/33                 |            | 0.52     |
| No. of animals in farm                                                 |                                    |                       |            |                                                                     |                                    |                       |            |          |
| Up to 250                                                              | 251-500                            | Over 500              |            | Up to 250                                                           | 251-500                            | Over 500              |            |          |
| 30/78                                                                  | 8/28                               | 4/13                  |            | 48/78                                                               | 20/28                              | 9/13                  |            | 0.60     |
| Yearly milk production per animal                                      |                                    |                       |            |                                                                     |                                    |                       |            |          |
| Up to 300 L                                                            |                                    | Over 300 L            |            | Up to 300 L                                                         |                                    | Over 300 L            |            |          |
| 35/100                                                                 |                                    | 7/19                  |            | 65/100                                                              |                                    | 12/19                 |            | 0.88     |

| Application of teat disinfection at milking |        |      |        |      |
|---------------------------------------------|--------|------|--------|------|
| Yes                                         | No     | Yes  | No     |      |
| 4/12                                        | 38/107 | 8/12 | 69/107 | 0.88 |

B) Analysis with only the farms with the six most frequently recorded breeds

| Number of farms                                                        |                |                                             |                    |                                                                     |                |                                             |                    |                       |
|------------------------------------------------------------------------|----------------|---------------------------------------------|--------------------|---------------------------------------------------------------------|----------------|---------------------------------------------|--------------------|-----------------------|
| Farms with no increased somatic cell counts in bulk-tank milk (n = 30) |                |                                             |                    | Farms with increased somatic cell counts in bulk-tank milk (n = 60) |                |                                             |                    | p                     |
| Breed                                                                  |                |                                             |                    |                                                                     |                |                                             |                    |                       |
| Alpine                                                                 | Damascus       | Indigenous Greek<br>( <i>Capra prisca</i> ) | Murciano-Granadina | Alpine                                                              | Damascus       | Indigenous Greek<br>( <i>Capra prisca</i> ) | Murciano-Granadina |                       |
| 6/9                                                                    | 5/18           | 10/50                                       | 9/13               | 3/9                                                                 | 13/18          | 40/50                                       | 4/13               | 0.001                 |
| Management system applied in farm                                      |                |                                             |                    |                                                                     |                |                                             |                    |                       |
| Intensive                                                              | Semi-intensive | Semi-extensive                              | Extensive          | Intensive                                                           | Semi-intensive | Semi-extensive                              | Extensive          |                       |
| 5/7                                                                    | 9/22           | 13/43                                       | 3/18               | 2/7                                                                 | 13/22          | 30/43                                       | 15/18              | 0.06                  |
| Application of machine-milking in farm                                 |                |                                             |                    |                                                                     |                |                                             |                    |                       |
| Yes                                                                    |                | No                                          |                    | Yes                                                                 |                | No                                          |                    |                       |
| 16/45                                                                  |                | 14/45                                       |                    | 29/45                                                               |                | 31/45                                       |                    | 0.65                  |
| Month into lactation period at sampling                                |                |                                             |                    |                                                                     |                |                                             |                    |                       |
| Up to 3 <sup>rd</sup>                                                  |                | 3 <sup>rd</sup> to 6 <sup>th</sup>          |                    | Up to 3 <sup>rd</sup>                                               |                | 3 <sup>rd</sup> to 6 <sup>th</sup>          |                    | After 6 <sup>th</sup> |
| 11/27                                                                  |                | 13/36                                       |                    | 6/27                                                                |                | 16/27                                       |                    | 23/36                 |
| 21/27                                                                  |                |                                             |                    |                                                                     |                |                                             |                    | 0.32                  |
| No. of animals in farm                                                 |                |                                             |                    |                                                                     |                |                                             |                    |                       |
| Up to 250                                                              |                | 251-500                                     |                    | Over 500                                                            |                | Up to 250                                   |                    | 251-500               |
| 20/55                                                                  |                | 7/24                                        |                    | 3/11                                                                |                | 35/55                                       |                    | 17/24                 |
|                                                                        |                |                                             |                    |                                                                     |                |                                             |                    | 8/11                  |
|                                                                        |                |                                             |                    |                                                                     |                |                                             |                    | 0.74                  |

| Yearly milk production per animal           |            |             |            |      |
|---------------------------------------------|------------|-------------|------------|------|
| Up to 300 L                                 | Over 300 L | Up to 300 L | Over 300 L |      |
| 25/78                                       | 5/12       | 53/78       | 7/12       | 0.51 |
| Application of teat disinfection at milking |            |             |            |      |
| Yes                                         | No         | Yes         | No         |      |
| 3/7                                         | 27/83      | 4/7         | 56/83      | 0.58 |

**Table S6.** Associations of zootechnical characteristics with increased total bacterial counts in bulk-tank milk (i.e., above  $1500 \times 10^3$  cfu mL<sup>-1</sup>) in 119 goat farms in Greece, as found in univariable analysis.

A) Analysis with all the farms, independently of the number of farms with each breed

| Number of farms                                                           |                                    |                       |            |                                                                        |                                    |                       |            |          |
|---------------------------------------------------------------------------|------------------------------------|-----------------------|------------|------------------------------------------------------------------------|------------------------------------|-----------------------|------------|----------|
| Farms with no increased total bacterial counts in bulk-tank milk (n = 90) |                                    |                       |            | Farms with increased total bacterial counts in bulk-tank milk (n = 29) |                                    |                       |            | <i>p</i> |
| Breed                                                                     |                                    |                       |            |                                                                        |                                    |                       |            |          |
| Alpine                                                                    | Crossbreds                         | Damascus              | Kefallinia | Alpine                                                                 | Crossbreds                         | Damascus              | Kefallinia |          |
| 7/9                                                                       | 15/18                              | 11/18                 | 0/1        | 2/9                                                                    | 3/18                               | 7/18                  | 1/1        |          |
| Indigenous Greek<br>( <i>Capra prisca</i> )                               | Murciano-Granadina                 | Saanen                | Skopelos   | Indigenous Greek<br>( <i>Capra prisca</i> )                            | Murciano-Granadina                 | Saanen                | Skopelos   |          |
| 38/50                                                                     | 10/13                              | 5/5                   | 4/5        | 12/50                                                                  | 3/13                               | 0/5                   | 1/5        | 0.38     |
| Management system applied in farm                                         |                                    |                       |            |                                                                        |                                    |                       |            |          |
| Intensive                                                                 | Semi-intensive                     | Semi-extensive        | Extensive  | Intensive                                                              | Semi-intensive                     | Semi-extensive        | Extensive  |          |
| 7/9                                                                       | 19/29                              | 48/61                 | 16/20      | 2/9                                                                    | 10/29                              | 13/61                 | 4/20       | 0.54     |
| Application of machine-milking in farm                                    |                                    |                       |            |                                                                        |                                    |                       |            |          |
| Yes                                                                       |                                    | No                    |            | Yes                                                                    |                                    | No                    |            |          |
| 51/66                                                                     |                                    | 39/53                 |            | 15/66                                                                  |                                    | 14/53                 |            | 0.64     |
| Month into lactation period at sampling                                   |                                    |                       |            |                                                                        |                                    |                       |            |          |
| Up to 3 <sup>rd</sup>                                                     | 3 <sup>rd</sup> to 6 <sup>th</sup> | After 6 <sup>th</sup> |            | Up to 3 <sup>rd</sup>                                                  | 3 <sup>rd</sup> to 6 <sup>th</sup> | After 6 <sup>th</sup> |            |          |
| 27/36                                                                     | 36/50                              | 27/33                 |            | 9/36                                                                   | 14/50                              | 6/33                  |            | 0.59     |
| No. of animals in farm                                                    |                                    |                       |            |                                                                        |                                    |                       |            |          |
| Up to 250                                                                 | 251-500                            | Over 500              |            | Up to 250                                                              | 251-500                            | Over 500              |            |          |
| 63/78                                                                     | 19/28                              | 8/13                  |            | 15/78                                                                  | 9/28                               | 5/13                  |            | 0.18     |
| Yearly milk production per animal                                         |                                    |                       |            |                                                                        |                                    |                       |            |          |
| Up to 300 L                                                               |                                    | Over 300 L            |            | Up to 300 L                                                            |                                    | Over 300 L            |            |          |
| 74/100                                                                    |                                    | 16/19                 |            | 26/100                                                                 |                                    | 3/19                  |            | 0.34     |

| Application of teat disinfection at milking |        |      |        |      |
|---------------------------------------------|--------|------|--------|------|
| Yes                                         | No     | Yes  | No     |      |
| 7/12                                        | 83/107 | 5/12 | 24/107 | 0.14 |

B) Analysis with only the farms with the six most frequently recorded breeds

| Number of farms                                                           |                                    |                                             |                       |                                                                        |                                    |                                             |                       |      |
|---------------------------------------------------------------------------|------------------------------------|---------------------------------------------|-----------------------|------------------------------------------------------------------------|------------------------------------|---------------------------------------------|-----------------------|------|
| Farms with no increased total bacterial counts in bulk-tank milk (n = 66) |                                    |                                             |                       | Farms with increased total bacterial counts in bulk-tank milk (n = 24) |                                    |                                             |                       | p    |
| Breed                                                                     |                                    |                                             |                       |                                                                        |                                    |                                             |                       |      |
| Alpine                                                                    | Damascus                           | Indigenous Greek<br>( <i>Capra prisca</i> ) | Murciano-Granadina    | Alpine                                                                 | Damascus                           | Indigenous Greek<br>( <i>Capra prisca</i> ) | Murciano-Granadina    |      |
| 7/9                                                                       | 11/18                              | 38/50                                       | 10/13                 | 2/9                                                                    | 7/18                               | 12/50                                       | 3/13                  | 0.63 |
| Management system applied in farm                                         |                                    |                                             |                       |                                                                        |                                    |                                             |                       |      |
| Intensive                                                                 | Semi-intensive                     | Semi-extensive                              | Extensive             | Intensive                                                              | Semi-intensive                     | Semi-extensive                              | Extensive             |      |
| 5/7                                                                       | 14/22                              | 33/43                                       | 14/18                 | 2/7                                                                    | 8/22                               | 10/43                                       | 4/18                  | 0.68 |
| Application of machine-milking in farm                                    |                                    |                                             |                       |                                                                        |                                    |                                             |                       |      |
| Yes                                                                       |                                    | No                                          |                       | Yes                                                                    |                                    | No                                          |                       |      |
| 33/45                                                                     |                                    | 33/45                                       |                       | 12/45                                                                  |                                    | 12/45                                       |                       | 1.00 |
| Month into lactation period at sampling                                   |                                    |                                             |                       |                                                                        |                                    |                                             |                       |      |
| Up to 3 <sup>rd</sup>                                                     | 3 <sup>rd</sup> to 6 <sup>th</sup> |                                             | After 6 <sup>th</sup> | Up to 3 <sup>rd</sup>                                                  | 3 <sup>rd</sup> to 6 <sup>th</sup> |                                             | After 6 <sup>th</sup> |      |
| 20/27                                                                     | 25/36                              |                                             | 21/27                 | 7/27                                                                   | 11/36                              |                                             | 6/27                  | 0.76 |
| No. of animals in farm                                                    |                                    |                                             |                       |                                                                        |                                    |                                             |                       |      |
| Up to 250                                                                 | 251-500                            |                                             | Over 500              | Up to 250                                                              | 251-500                            |                                             | Over 500              |      |
| 44/55                                                                     | 16/24                              |                                             | 6/11                  | 11/55                                                                  | 8/24                               |                                             | 5/11                  | 0.15 |

| Yearly milk production per animal           |            |             |            |      |
|---------------------------------------------|------------|-------------|------------|------|
| Up to 300 L                                 | Over 300 L | Up to 300 L | Over 300 L |      |
| 57/78                                       | 9/12       | 21/78       | 3/12       | 0.89 |
| Application of teat disinfection at milking |            |             |            |      |
| Yes                                         | No         | Yes         | No         |      |
| 3/7                                         | 63/83      | 4/7         | 20/83      | 0.06 |
